# Supplementary material for: Synthesis and synergistic antibacterial efficiency of chitosan-copper oxide nanocomposites
Source: PubMed Central journal article supplement — Heliyon. 2024 Aug 2;10(15):e35588. doi: 10.1016/j.heliyon.2024.e35588 (PMC11337737; doi:10.1016/j.heliyon.2024.e35588), 2024-08-02
Supplement: mmc1.pdf [file mmc1.pdf]

Supplementary material for

**Synthesis and synergistic antibacterial efficiency of chitosan-copper oxide nanocomposites**

Jüri Laanoja<sup>1,2</sup>, Mariliis Sihtmäe<sup>1</sup>, Svetlana Vihodceva<sup>3</sup>, Mairis Iesalnieks<sup>3</sup>, Maarja Otsus<sup>1</sup>, Imbi Kurvet<sup>1</sup>, Anne Kahru<sup>1,3</sup>, Kaja Kasemets<sup>1,\*</sup>

<sup>1</sup> Laboratory of Environmental Toxicology, National Institute of Chemical Physics and Biophysics, Akadeemia tee 23, 12618 Tallinn, Estonia

<sup>2</sup> Department of Chemistry and Biotechnology, School of Science, Tallinn University of Technology, Ehitajate tee 5, 19086 Tallinn, Estonia

<sup>3</sup> Institute of Materials and Surface Engineering, Faculty of Natural Sciences and Technology, Riga Technical University, Paula Valdena 3/7, LV-1048 Riga, Latvia

<sup>4</sup> Estonian Academy of Sciences, Kohtu 6, 10130 Tallinn, Estonia

\* Corresponding author. E-mail address: [kaja.kasemets@kbfi.ee](mailto:kaja.kasemets@kbfi.ee)

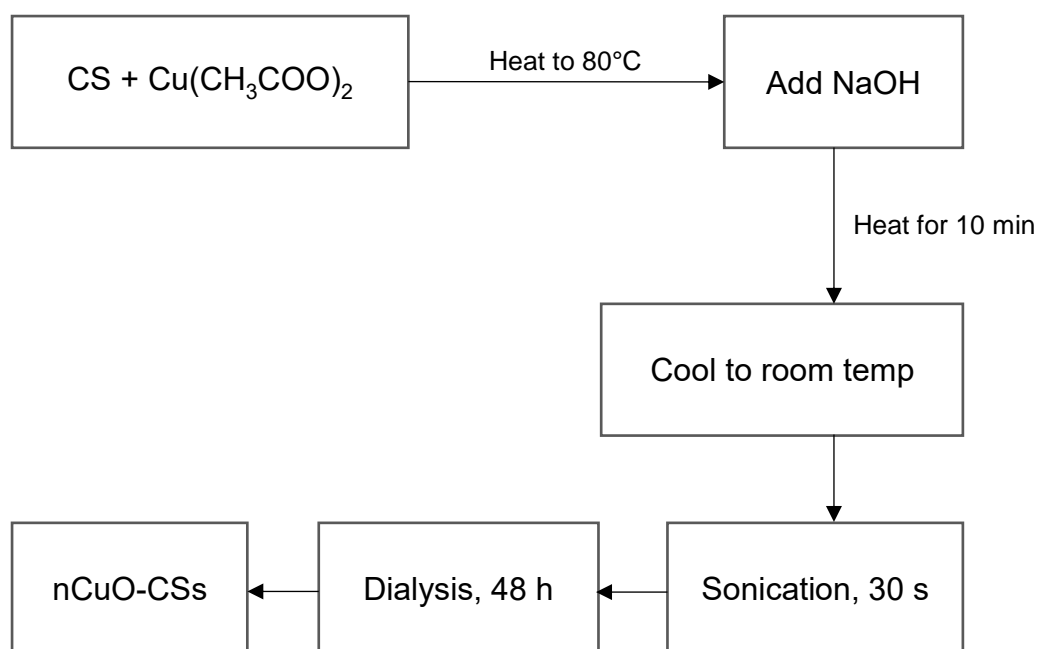

**Figure S1.** Schematic representation of the synthesis of chitosan-copper oxide nanocomposites (nCuO-CSs). Chitosan (CS) and copper(II) acetate are mixed in three Cu:CS ratios (1:0.3, 1:1, 1:3) on a magnetic stirrer with temperature control. Based on Cu:CS mass ratio, approximately 0.55, 0.8 or 1.1 mL of 1M NaOH is added drop-wisely. Dialysis (cut-off 12 000 kDa) is performed against 2 L of deionized water (changed after 24 h).

### S1. Measurement of abiotic and biotic reactive oxygen species (ROS)

The tests in abiotic (i.e., without bacteria) conditions were performed as described by Aruoja *et al.* [1]. In short, a 1.3 mM solution of DCFH2-DA was prepared in ethanol, deacetylated with 0.01 M NaOH at a ratio of 1:4 (DCFH2-DA:NaOH) and incubated for 30 min in the dark at room temperature. The reaction was stopped by diluting the solution 6-fold with 25 mM sodium phosphate buffer (pH 7.4). The mixture was stored on ice and protected from light until further use. 100  $\mu$ L of that solution was added to the wells of a black 96-well microplate (Greiner Bio-One, Frickenhausen, Germany) containing 100  $\mu$ L of the studied NCs in DI water. The plates were incubated for 30 min in the dark at room temperature. Fluorescence was recorded as described below. DI water was used as a negative control. Manganese(II, III) oxide ( $Mn_3O_4$ ) nanoparticles (synthesized previously [1]) were used as a positive control.

The potential of the NCs to induce intracellular (biotic) ROS generation was determined, as detailed by Käosaar *et al.* [2]. Briefly, the bacteria were cultured and exposed to NCs in accordance to section 2.5. However, black 96-well microplates were used in this analysis. A 5 mM solution of DCFH2-DA was prepared in ethanol, diluted 10x with 25 mM sodium phosphate buffer (pH 7.4), and 50  $\mu$ L added to each of the 96-well microplate wells. The plates were covered with a gas-permeable microplate film (nerbe plus GmbH & Co. KG, Winsen (Luhe), Germany) and incubated for 30 min in the dark at room temperature. DI water was used as a negative and  $H_2O_2$  as a positive control. Each test was carried out twice.

Fluorescence (excitation at 485 nm and emission at 527 nm) was recorded with a Fluoroskan Ascent FL (Thermo Labsystems, Helsinki, Finland) microplate reader. The abiotic and biotic ROS levels were presented via the following calculation:

$$F = \frac{F_{t30} (sample)}{F_{t30} (control)}$$

where  $F_{t30}$  (sample) and  $F_{t30}$  (control) are the recorded fluorescence values of the studied NC suspension and negative control, respectively, after 30 min incubation with the fluorescent dye. Fluorescence is presented in relative units (RFU).

### References

- [1] V. Aruoja, S. Pokhrel, M. Sihtmäe, M. Mortimer, L. Mädler, A. Kahru, Toxicity of 12 metal-based nanoparticles to algae, bacteria and protozoa, *Environ. Sci. Nano* 2 (2015) 630–644. <https://doi.org/10.1039/C5EN00057B>.
- [2] S. Käosaar, A. Kahru, P. Mantecca, K. Kasemets, Profiling of the toxicity mechanisms of coated and uncoated silver nanoparticles to yeast *Saccharomyces cerevisiae* BY4741 using a set of its 9 single-gene deletion mutants defective in oxidative stress response, cell wall or membrane integrity and endocytosis, *Toxicol. In Vitro* 35 (2016) 149–162. <https://doi.org/10.1016/j.tiv.2016.05.018>.

## S2. Visualization of bacterial cell membrane damage

To visualize the impact of nCuO-CSs on the integrity of bacterial cell membrane, the cells were stained after a 1-h exposure to the nanocomposites at a concentration of 1 mg Cu/L and comparatively to copper(II) acetate at 1 mg Cu/L and low molecular weight chitosan at 1 and 3 mg/L, with propidium iodide (PI, 81845; Sigma-Aldrich, Steinheim, Germany), which penetrates only cells with damaged membranes, and SYTO 9 (S34854; Thermo Fisher Scientific, Waltham, MA, USA), which can enter both damaged and intact cells. A 0.1% (w/vol) sodium dodecyl sulfate (SDS) solution was used as a positive control for membrane-compromised cells (PI-positive cells). The final working concentrations of the PI and SYTO 9 were 30 and 5  $\mu$ M, respectively. After a 10-minute incubation in the dark at room temperature, the stained bacterial suspensions were observed on a 1.3% agarose pad using a Zeiss LSM800 widefield fluorescence microscope (Zeiss, Jena, Germany) equipped with Zeiss Filter Set 10. PI and SYTO 9 signals were detected at 575–640 nm and 515–565 nm, respectively. In the case of nCuO-CS\_1 and nCuO-CS\_3, due to the tendency to form large cell aggregations, a Zeiss LSM800 confocal laser scanning microscope (CLSM) was applied using excitation/emission track settings of 561 nm/550–700 nm for the PI signal and 488 nm/450–550 nm for the SYTO 9 signal.

**Table S1.** The change of hydrodynamic size, polydispersity index, and  $\zeta$ -potential with storage at 4 °C in the dark. The dynamic light scattering and electrophoretic light scattering analyses of chitosan-copper oxide nanocomposites (nCuO-CS) were carried out at a concentration of  $\sim$ 40 mg Cu/L in deionized water.

| Sample      | Cu:CS*<br>ratio | Hydrodynamic size, nm  |           |            |            | Average | SD   |
|-------------|-----------------|------------------------|-----------|------------|------------|---------|------|
|             |                 | 8.05.2023              | 4.09.2023 | 31.10.2023 | 31.01.2024 |         |      |
| nCuO-CS_0.3 | 1:0.3           | 91.7                   | 90.2      | 90.6       | 103        | 93.8    | 5.97 |
| nCuO-CS_1   | 1:1             | 122                    | 124       | 118        | 154        | 130     | 16.7 |
| nCuO-CS_3   | 1:3             | 180                    | 178       | 168        | 205        | 183     | 15.5 |
|             |                 | Polydispersity index   |           |            |            |         |      |
| nCuO-CS_0.3 | 1:0.3           | 0.24                   | 0.23      | 0.23       | 0.35       | 0.26    | 0.06 |
| nCuO-CS_1   | 1:1             | 0.25                   | 0.27      | 0.26       | 0.41       | 0.30    | 0.08 |
| nCuO-CS_3   | 1:3             | 0.33                   | 0.35      | 0.27       | 0.39       | 0.33    | 0.05 |
|             |                 | $\zeta$ -potential, mV |           |            |            |         |      |
| nCuO-CS_0.3 | 1:0.3           | 46.2                   | 45.0      | 43.1       | 40.0       | 43.6    | 2.72 |
| nCuO-CS_1   | 1:1             | 45.8                   | 46.0      | 41.5       | 44.0       | 44.3    | 2.08 |
| nCuO-CS_3   | 1:3             | 44.7                   | 43.5      | 41.8       | 42.0       | 43.0    | 1.36 |

\* CS – chitosan

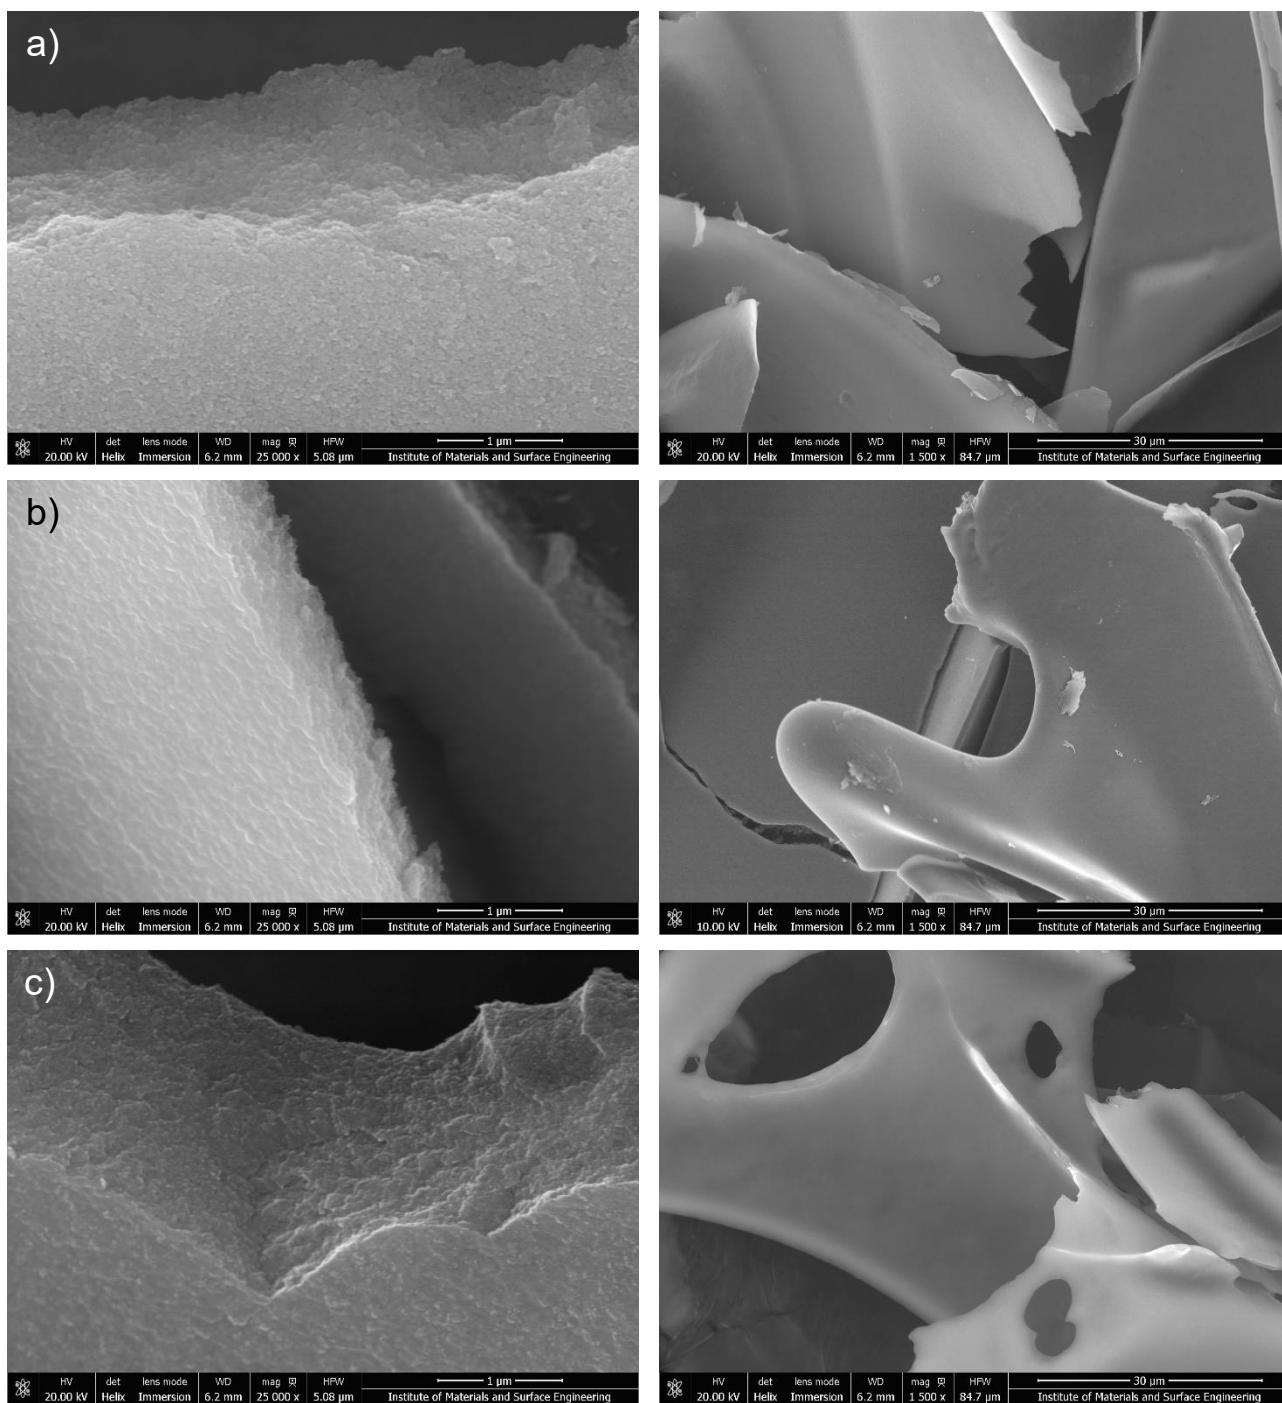

**Figure S2.** SEM images of chitosan-copper oxide nanocomposites (nCuO-CS). (a) nCuO-CS\_0.3, (b) nCuO-CS\_1, (c) nCuO-CS\_3. nCuO-CS\_0.3, nCuO-CS\_1 and nCuO-CS\_3 designate nanocomposites with different Cu:chitosan mass ratios (1:0.3, 1:1 and 1:3, respectively).

**Table S2.** The elemental composition (at%) of chitosan-copper oxide nanocomposites (nCuO-CS) as measured by energy-dispersive X-ray spectroscopy (EDS) and X-ray photoelectron spectroscopy (XPS), respectively. The nCuO-CS samples were lyophilized prior to analyses.

| EDS         | Cu:CS* mass ratio | Cu   | N    | O    | C    |
|-------------|-------------------|------|------|------|------|
| Chitosan    | -                 | 0    | 12.9 | 28.0 | 59.1 |
| nCuO-CS_0.3 | 1:0.3             | 17.0 | 6.0  | 33.4 | 43.5 |
| nCuO-CS_1   | 1:1               | 10.7 | 8.3  | 29.5 | 51.5 |
| nCuO-CS_3   | 1:3               | 15.3 | 4.1  | 24.3 | 56.2 |
| XPS         | Cu:CS* mass ratio | Cu   | N    | O    | C    |
| Chitosan    | -                 | 0    | 7.4  | 31.4 | 61.2 |
| nCuO-CS_0.3 | 1:0.3             | 3.2  | 5.4  | 33.0 | 58.4 |
| nCuO-CS_1   | 1:1               | 1.7  | 6.2  | 30.3 | 61.8 |
| nCuO-CS_3   | 1:3               | 1.0  | 4.3  | 27.7 | 67.0 |

\* CS – chitosan

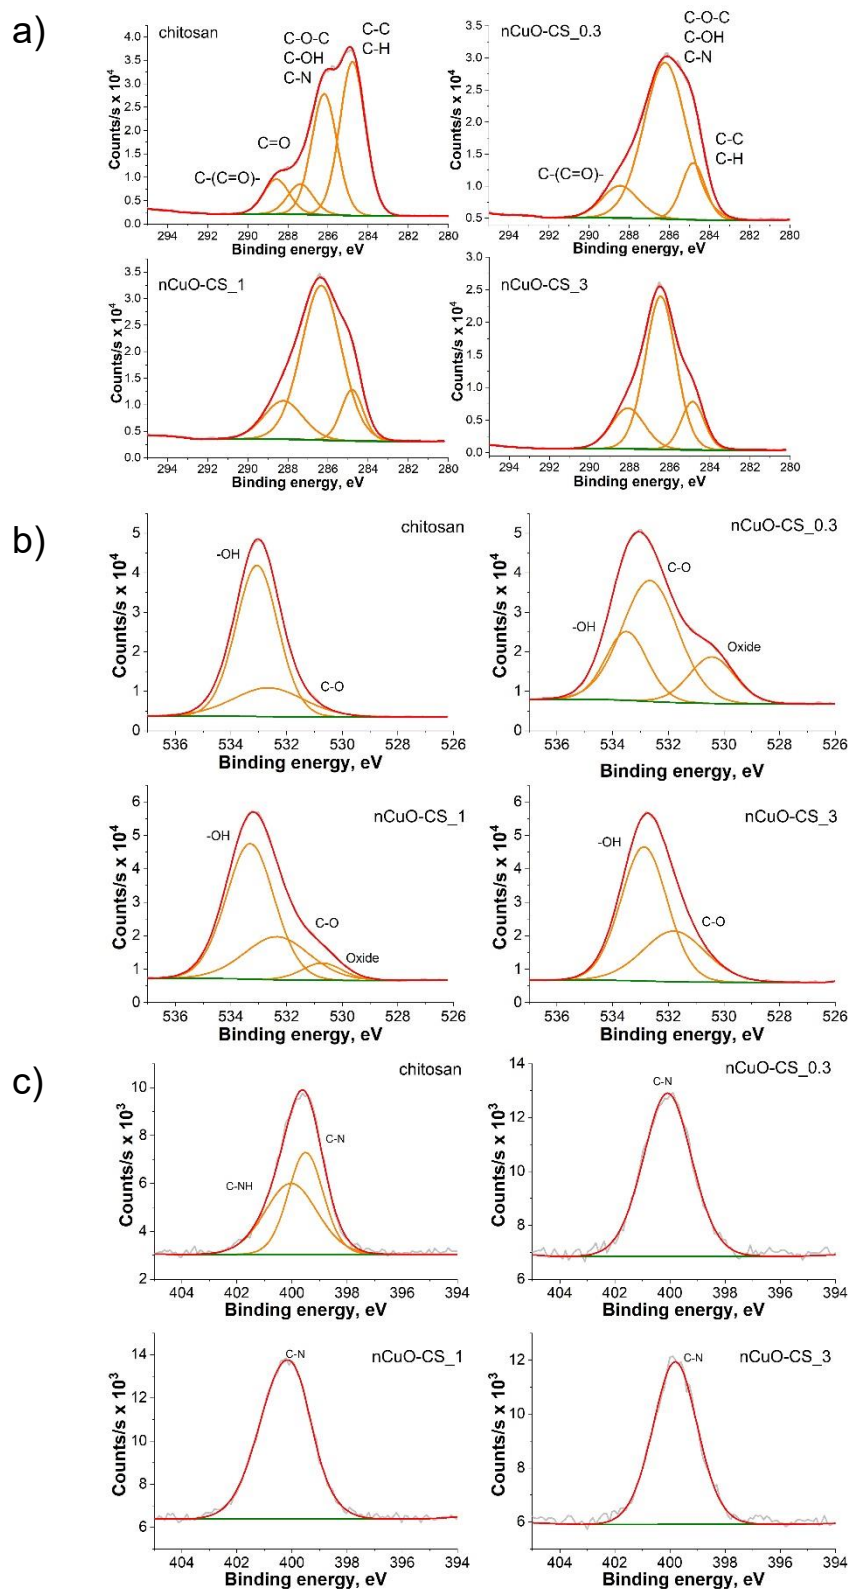

**Figure S3.** X-ray photoelectron spectroscopy narrow scan spectra of chitosan-copper oxide nanocomposites (nCuO-CS). (a) Carbon 1s, (b) oxygen 1s, (c) nitrogen 1s. nCuO-CS\_0.3, nCuO-CS\_1 and nCuO-CS\_3 designate nanocomposites with different Cu:chitosan mass ratios (1:0.3, 1:1 and 1:3, respectively).

**Table S3.** Minimum biocidal concentration (MBC) of chitosan-copper oxide nanocomposites (nCuO-CSs). nCuO-CS\_0.3, nCuO-CS\_1 and nCuO-CS\_3 designate nanocomposites with different Cu:chitosan mass ratios (1:0.3, 1:1 and 1:3, respectively), nCuO refers to commercially available CuO nanoparticles (Sigma-Aldrich, St. Louis, MO, USA) and Cu<sup>2+</sup> to copper(II) acetate. Low molecular weight chitosan (50–190 kDa, 75–85% deacetylated) was used for additional comparison.

| Bacteria           | MBC, mg Cu/L     | 1 h  | SD   | 4 h  | SD   | 24 h | SD   |
|--------------------|------------------|------|------|------|------|------|------|
| <i>E. coli</i>     | nCuO-CS_0.3      | 0.96 | 0.10 | 0.29 | 0.10 | 0.24 | 0.03 |
| ATCC 25922<br>(G-) | nCuO-CS_1        | 0.83 | 0.20 | 0.31 | 0.10 | 0.22 | 0.05 |
|                    | nCuO-CS_3        | 0.75 | 0.27 | 0.25 | 0.00 | 0.17 | 0.05 |
|                    | Cu <sup>2+</sup> | 1.67 | 0.52 | 0.46 | 0.10 | 0.32 | 0.11 |
|                    | nCuO             | 160  | 0.00 | 10.0 | 4.71 | 1.04 | 0.29 |
|                    | chitosan         | 1.42 | 0.60 | 1.02 | 0.26 | 0.92 | 0.25 |

  

| Bacteria       | MBC, mg Cu/L     | 1 h  | SD   | 4 h   | SD   | 24 h | SD   |
|----------------|------------------|------|------|-------|------|------|------|
| <i>E. coli</i> | nCuO-CS_0.3      | 0.50 | 0.00 | 0.30  | 0.11 | 0.21 | 0.06 |
| MG1655<br>(G-) | nCuO-CS_1        | 0.50 | 0.00 | 0.25  | 0.09 | 0.16 | 0.06 |
|                | nCuO-CS_3        | 0.24 | 0.02 | 0.18  | 0.05 | 0.12 | 0.04 |
|                | Cu <sup>2+</sup> | 0.90 | 0.14 | 0.35  | 0.14 | 0.24 | 0.09 |
|                | nCuO             | 160  | 0.00 | 10.42 | 5.10 | 2.86 | 1.35 |
|                | chitosan         | 1.56 | 0.66 | 1.10  | 0.14 | 1.10 | 0.14 |

  

| Bacteria             | MBC, mg Cu/L     | 1 h  | SD   | 4 h   | SD   | 24 h | SD   |
|----------------------|------------------|------|------|-------|------|------|------|
| <i>P. aeruginosa</i> | nCuO-CS_0.3      | 1.50 | 0.58 | 0.44  | 0.13 | 0.25 | 0.00 |
| ATCC 27853<br>(G-)   | nCuO-CS_1        | 1.00 | 0.00 | 0.44  | 0.13 | 0.25 | 0.00 |
|                      | nCuO-CS_3        | 0.63 | 0.14 | 0.38  | 0.14 | 0.25 | 0.00 |
|                      | Cu <sup>2+</sup> | 3.25 | 0.96 | 0.63  | 0.25 | 0.25 | 0.00 |
|                      | nCuO             | >250 |      | 24.24 | 3.68 | 1.39 | 0.27 |
|                      | chitosan         | 3.00 | 1.41 | 2.00  | 0.00 | 2.00 | 0.00 |

  

| Bacteria          | MBC, mg Cu/L     | 1 h  | SD   | 4 h  | SD   | 24 h | SD   |
|-------------------|------------------|------|------|------|------|------|------|
| <i>S. aureus</i>  | nCuO-CS_0.3      | 14.0 | 2.31 | 0.25 | 0.00 | 0.15 | 0.04 |
| ATCC 6538<br>(G+) | nCuO-CS_1        | 16.0 | 0.00 | 0.43 | 0.28 | 0.15 | 0.04 |
|                   | nCuO-CS_3        | 16.0 | 0.00 | 0.53 | 0.16 | 0.22 | 0.06 |
|                   | Cu <sup>2+</sup> | 8.00 | 3.27 | 0.47 | 0.06 | 0.22 | 0.04 |
|                   | nCuO             | >250 |      | 6.51 | 0.00 | 0.98 | 0.00 |
|                   | chitosan         | >500 |      | >500 |      | 250  | 0.00 |



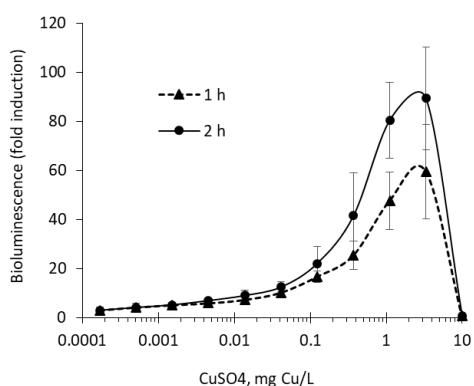

**Figure S4.** Induction (fold) of Cu-sensing bacteria *Escherichia coli* MC1061(pSLcueR/pDNPcopAlux) by CuSO<sub>4</sub> after 1 and 2 h incubation at 30°C in the medium composed of 20 mM MOPS (pH 6.5), 0.05% acid hydrolyzed casein, and 0.05% glucose.

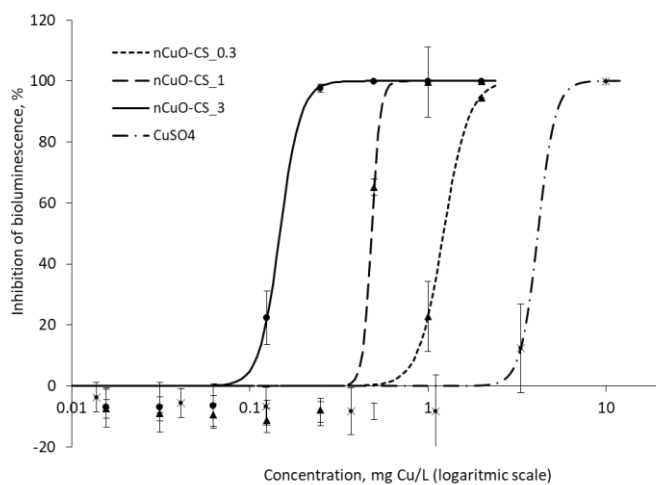

**Figure S5.** Inhibition of bioluminescence (% of control) of *Escherichia coli* MC1061(pDNLux) (control bacteria) by chitosan-copper oxide nanocomposites with mass ratios of 1:0.3 (nCuO-CS\_0.3), 1:1 (nCuO-CS\_1), 1:3 (nCuO-CS\_3), and CuSO<sub>4</sub> after 2-h incubation at 30°C in the medium composed of 20 mM MOPS (pH 6.5), 0.05% acid hydrolyzed casein, and 0.05% glucose.

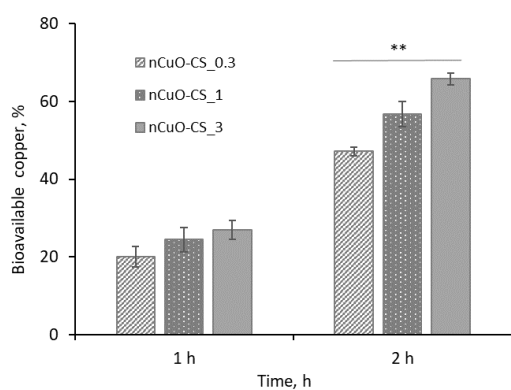

**Figure S6.** Bioavailable (intracellular) copper from chitosan-copper oxide nanocomposites (nCuO-CS) at a concentration of 0.016 mg Cu/L after 1 and 2 h exposure. Bioavailable copper was measured by Cu-inducible bacteria *Escherichia coli* MC1061(pSLcueR/pDNPcopAlux) at 30°C in the induction medium composed of 20 mM MOPS (pH 6.5), 0.05% acid-hydrolyzed casein, and 0.05% glucose. nCuO-CS\_0.3, nCuO-CS\_1 and nCuO-CS\_3 designate nanocomposites with different Cu:chitosan mass ratios (1:0.3, 1:1 and 1:3, respectively). Asterisks designate statistically significant differences, \*\*  $p < 0.01$  (calculated by t-test in Microsoft Excel 2019).

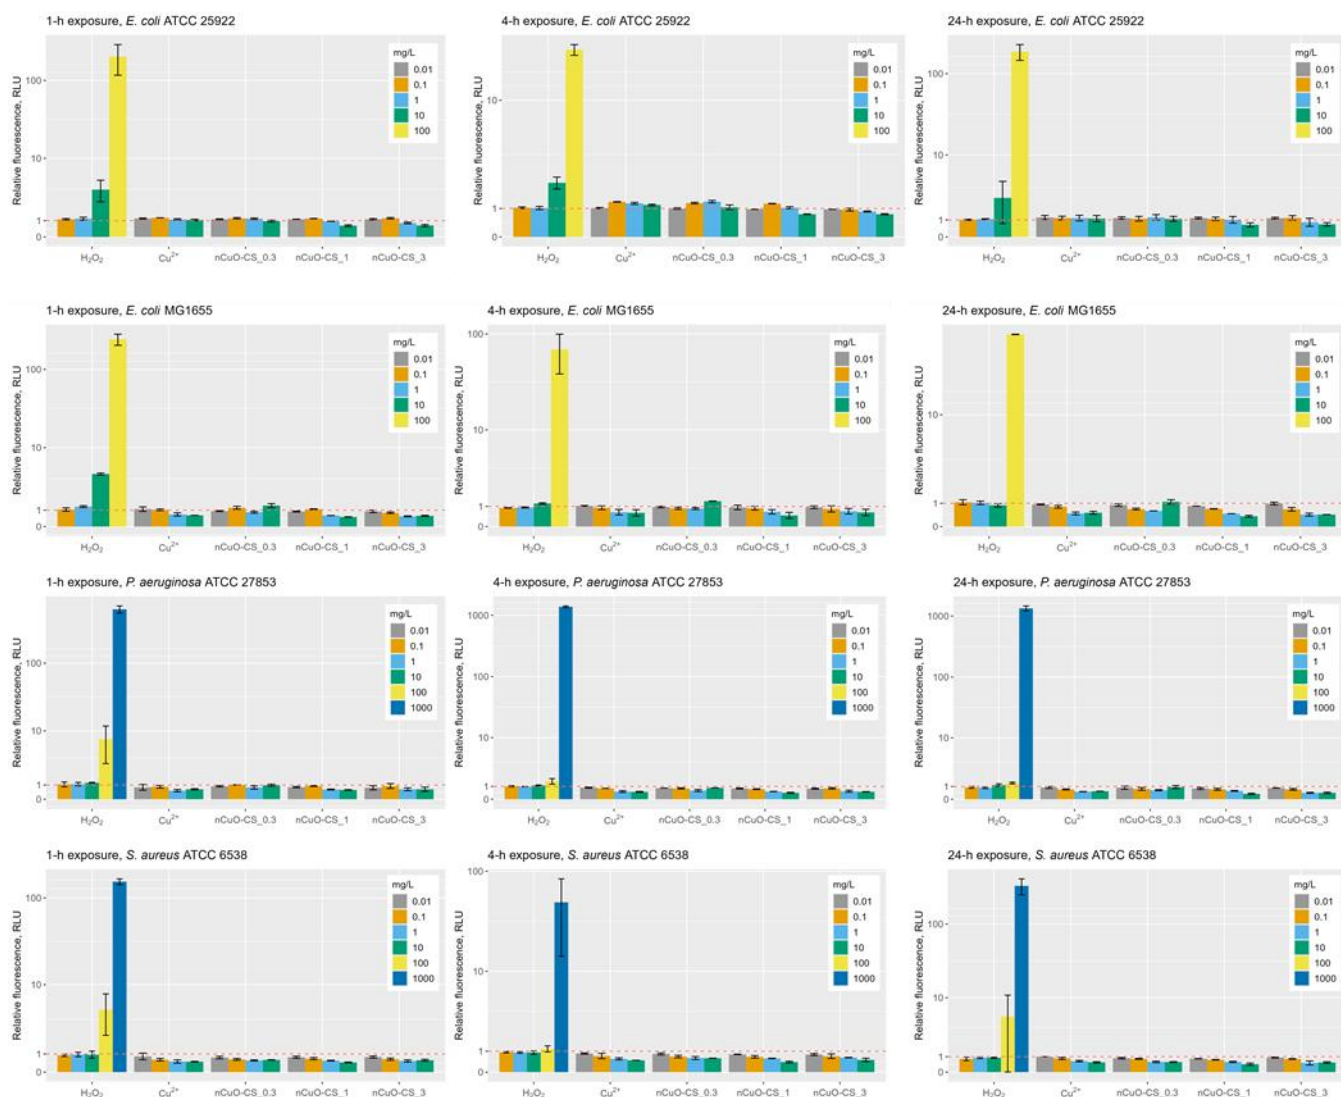

**Figure S7.** Generation of reactive oxygen species (ROS) by chitosan-copper oxide nanocomposites (nCuO-CS). The values are based on the increase in fluorescence in the presence of nCuO-CSs compared to the negative control (deionized water), hydrogen peroxide (H<sub>2</sub>O<sub>2</sub>) was used as a positive control, the mean of two experiments with standard deviation is presented, the dashed line represents ROS level in deionized water. nCuO-CS\_0.3, nCuO\_CS\_1 and nCuO-CS\_3 designate nanocomposites with different Cu:chitosan mass ratios (1:0.3, 1:1 and 1:3, respectively).

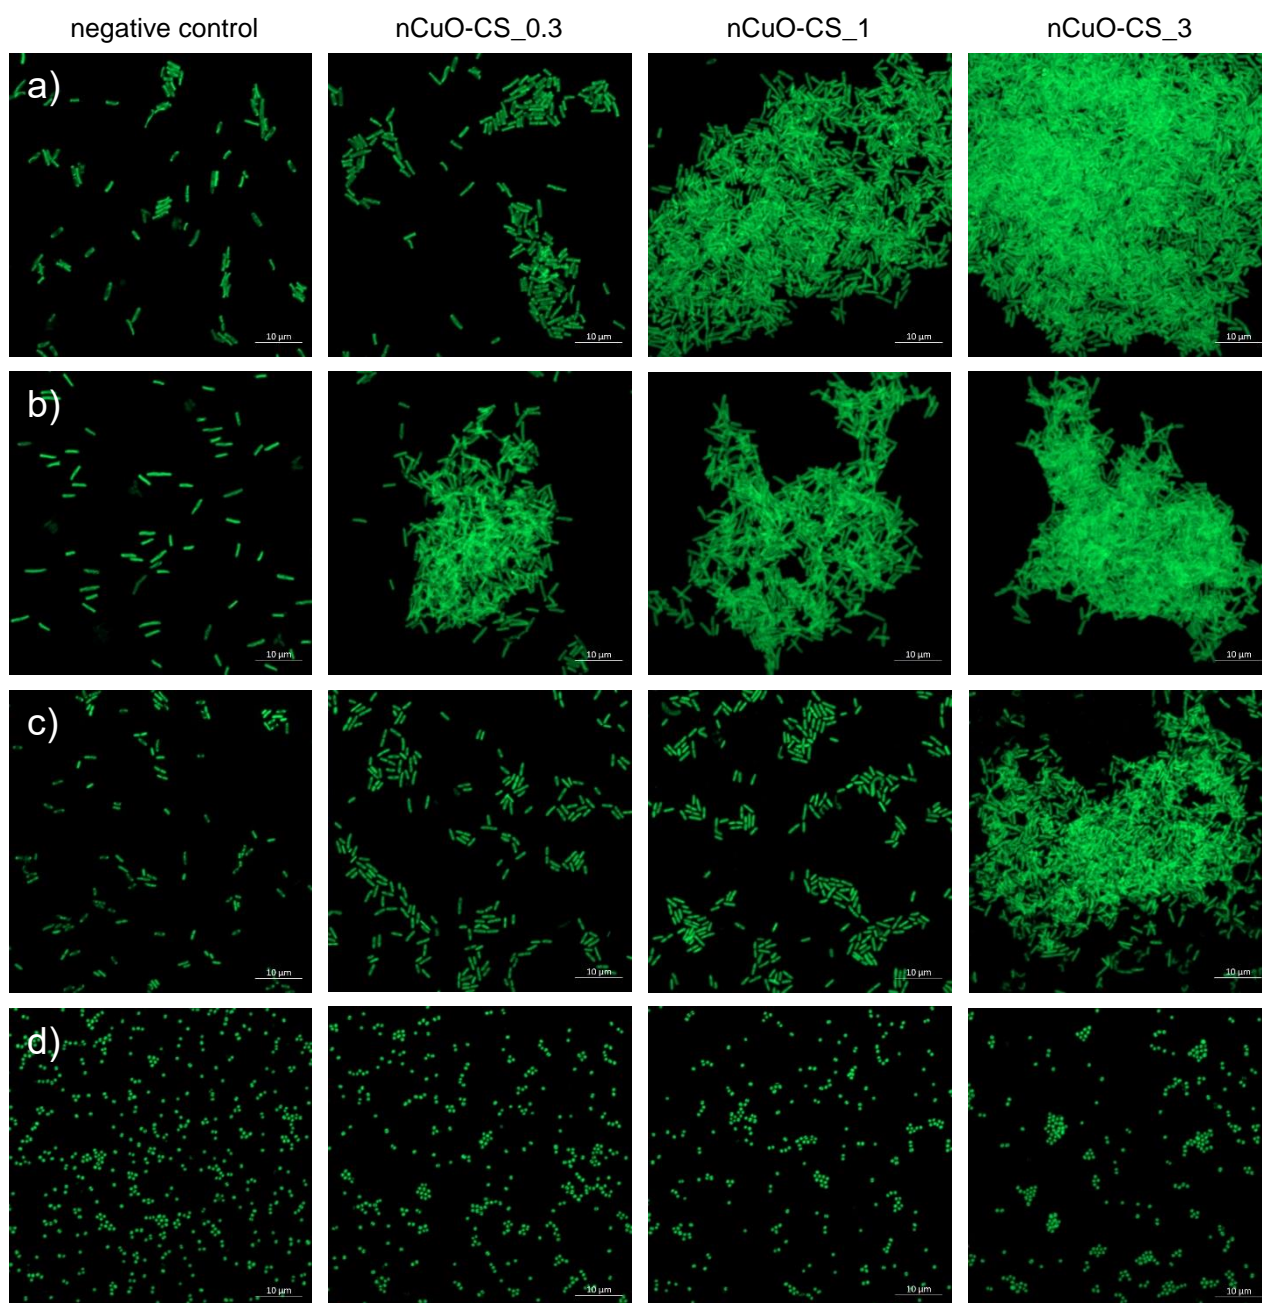

**Figure S8.** Confocal laser scanning microscopy images of bacterial cells. (a) *Escherichia coli* ATCC 25922, (b) *E. coli* MG1655, (c) *Pseudomonas aeruginosa* ATCC 27853, and (d) *Staphylococcus aureus* ATCC 6538 were exposed to chitosan-copper oxide nanocomposites (nCuO-CS) in deionized water at a concentration of 1 mg Cu/L for 1 h at 30°C in the dark. nCuO-CS\_0.3, nCuO-CS\_1, and nCuO-CS\_3 designate nanocomposites with different Cu:chitosan mass ratios (1:0.3, 1:1, and 1:3, respectively). All scale bars are 10 μm.

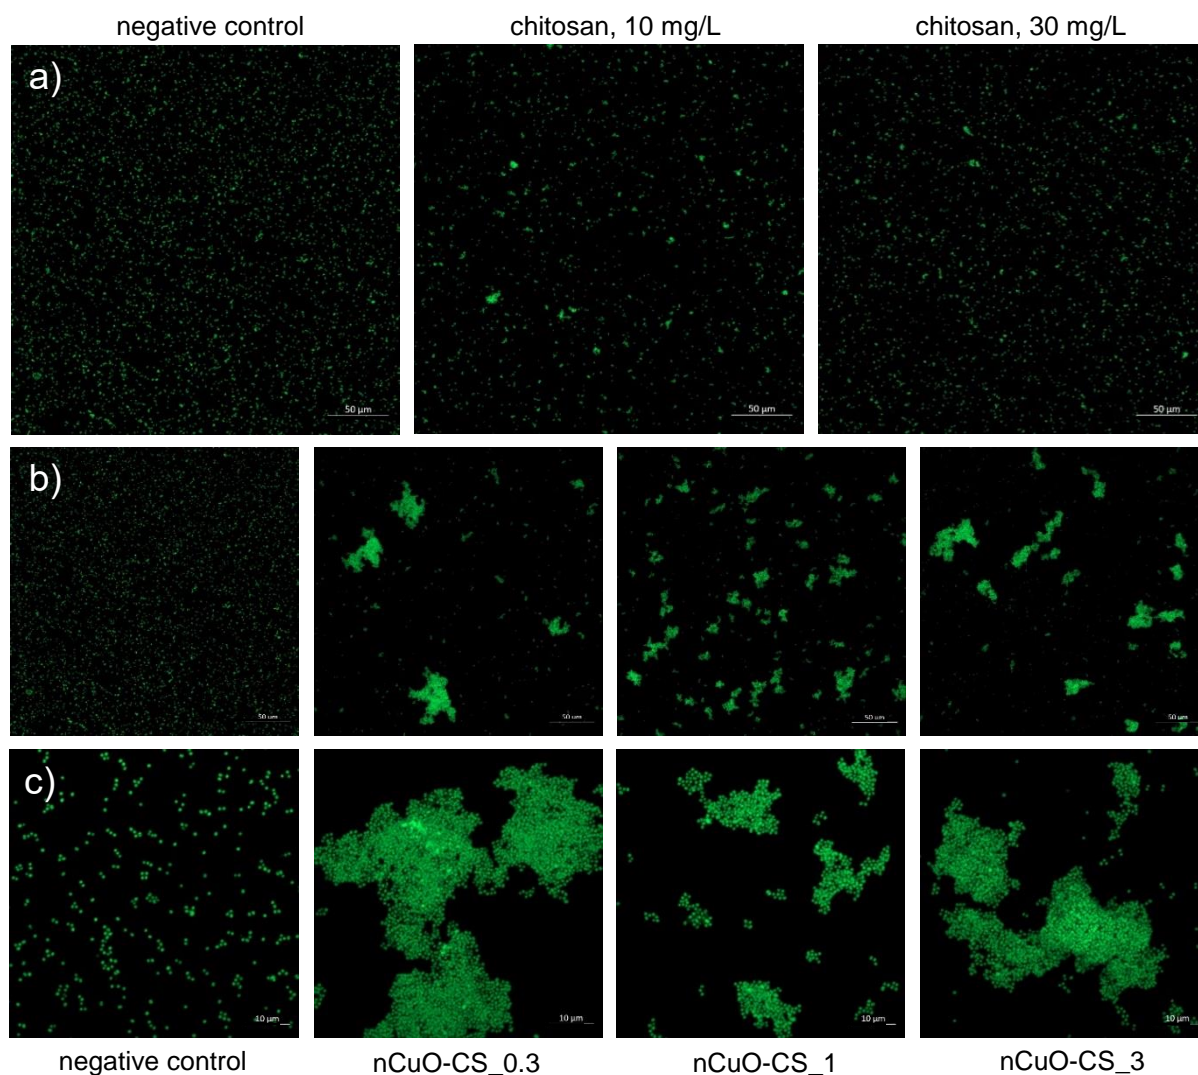

**Figure S9.** Confocal laser scanning microscopy images of the Gram-positive *Staphylococcus aureus* ATCC 6538. (a) *S. aureus* was exposed to low molecular weight chitosan at two concentrations – 10 and 30 mg/L – and (b), (c) to chitosan-copper oxide nanocomposites (nCuO-CS) in deionized water at a concentration of 10 mg Cu/L for 1 h at 30°C in the dark. nCuO-CS\_0.3, nCuO-CS\_1, and nCuO-CS\_3 designate nanocomposites with different Cu:chitosan mass ratios (1:0.3, 1:1, and 1:3, respectively). The scale bars are 50 (a, b) or 10 μm (c).

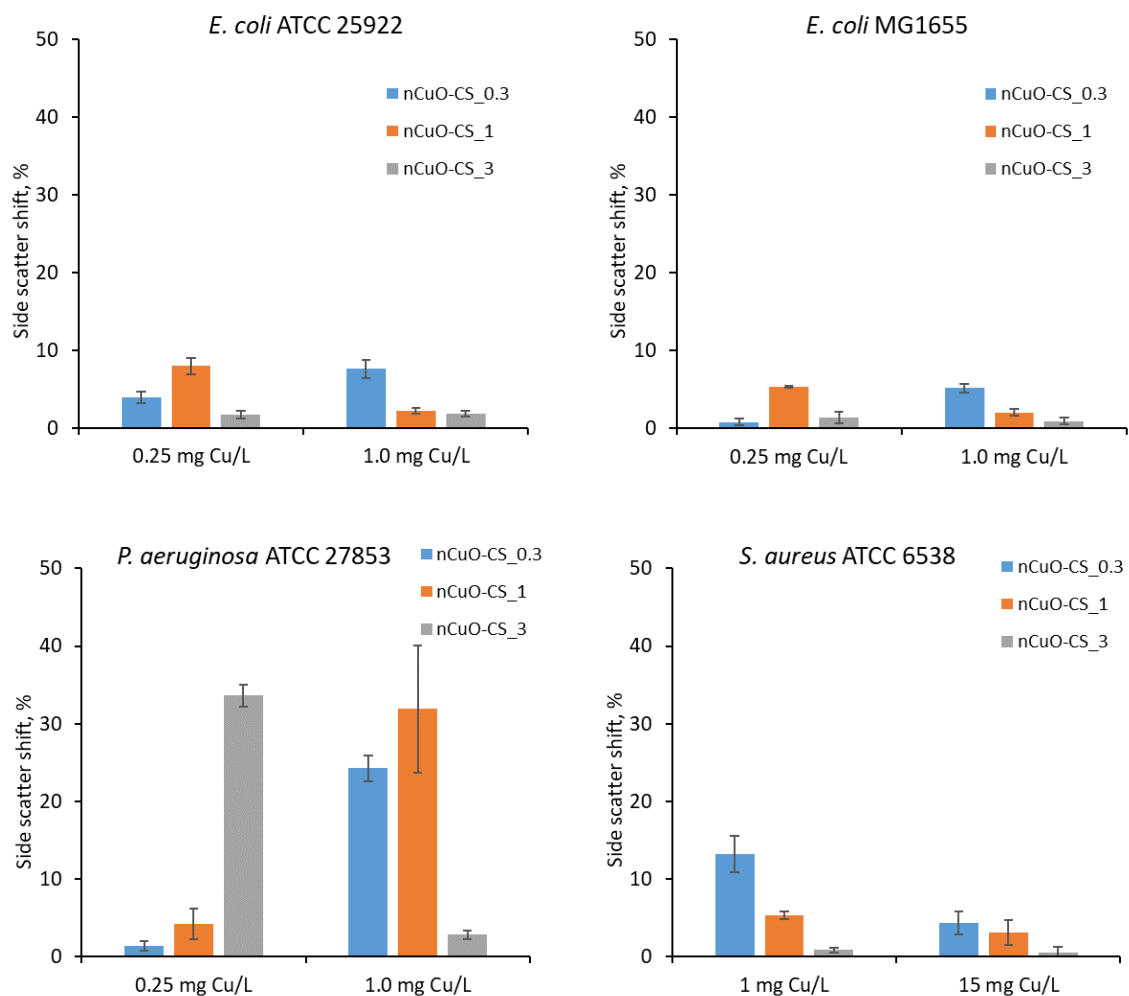

**Figure S10.** Flow cytometry studies of bacteria-nanocomposite interactions. *Escherichia coli* ATCC 25922, *E. coli* MG1655, and *Pseudomonas aeruginosa* ATCC 27853 were exposed to chitosan-copper oxide nanocomposites (nCuO-CS) in deionized water at two concentrations – 0.25 and 1 mg Cu/L – for 1 h at 30°C in the dark; *Staphylococcus aureus* ATCC 6538 was similarly exposed but at concentrations of 1 and 15 mg Cu/L. 20 000 cells were analyzed from each sample, and interactions between bacteria and nCuO-CSs attributed to the increase in side scattered light intensity compared to the (unexposed) control cells. nCuO-CS\_0.3, nCuO-CS\_1, and nCuO-CS\_3 designate nanocomposites with different Cu:chitosan mass ratios (1:0.3, 1:1, and 1:3, respectively).

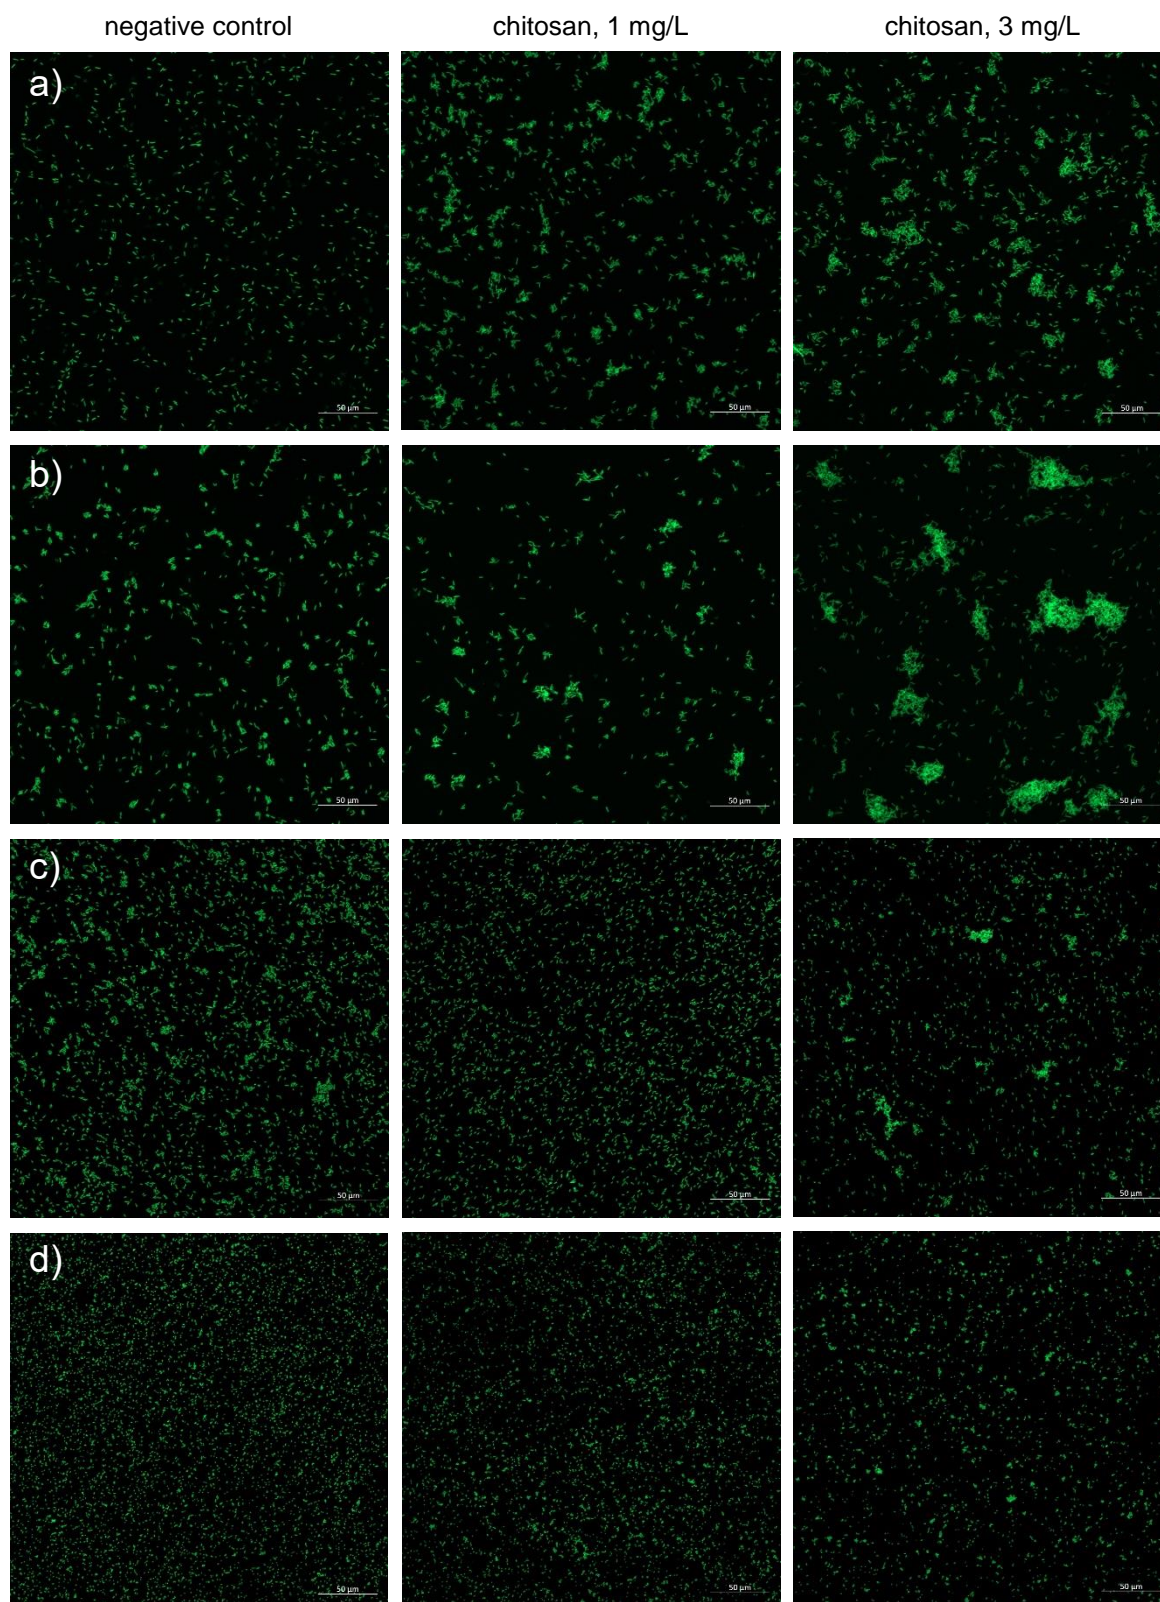

**Figure S11.** Confocal laser scanning microscopy images of bacterial cells. (a) *Escherichia coli* ATCC 25922, (b) *E. coli* MG1655, (c) *Pseudomonas aeruginosa* ATCC 27853, and (d) *Staphylococcus aureus* ATCC 6538 were exposed to low molecular weight chitosan at two concentrations – 1 and 3 mg/L – for 1 h at 30°C in the dark. All scale bars are 50 µm.

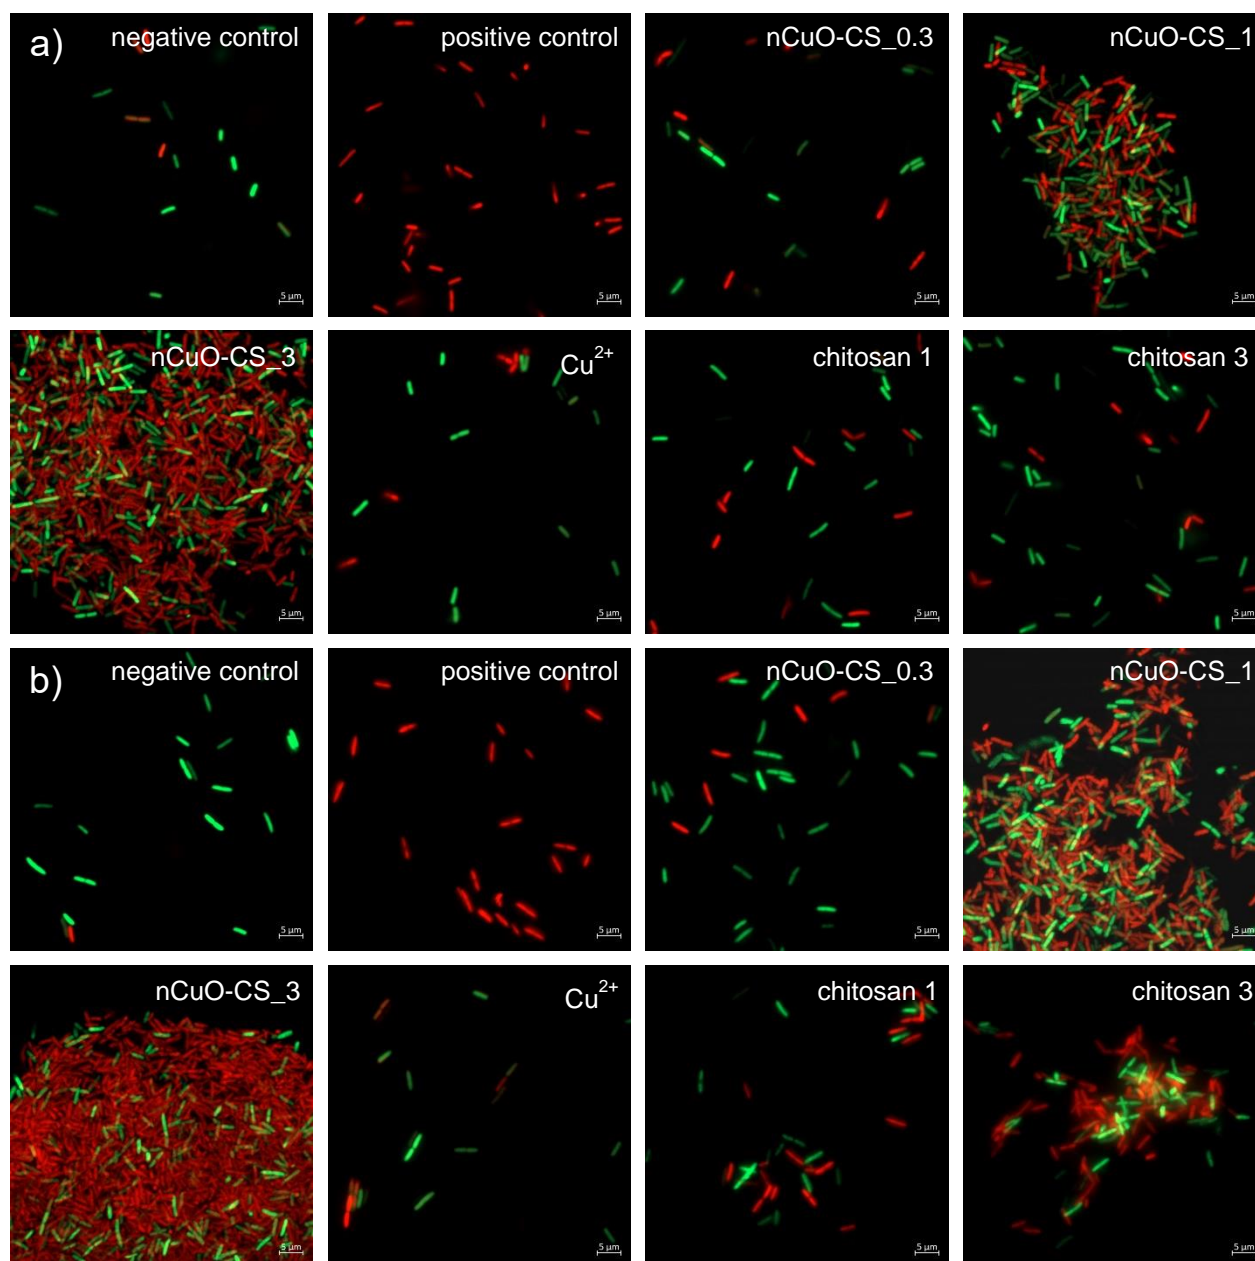

**Figure S12.** Microscopy images of bacterial cells. (a) *Escherichia coli* ATCC 25922 and (b) *E. coli* MG1655 were exposed to chitosan-copper oxide nanocomposites (nCuO-CS) in deionized water at a concentration of 1 mg Cu/L for 1 h at 30°C in the dark. nCuO-CS\_0.3, nCuO-CS\_1, and nCuO-CS\_3 designate nanocomposites with different Cu:chitosan mass ratios (1:0.3, 1:1, and 1:3, respectively). A 0.1% (w/vol) sodium dodecyl sulfate solution was used as a positive control for membrane-compromised cells. Copper(II) acetate (1 mg Cu/L) and low molecular weight chitosan (1 and 3 mg/L) were analyzed for comparison. After exposure, the cells were stained with propidium iodide and SYTO 9. All scale bars are 5 µm.



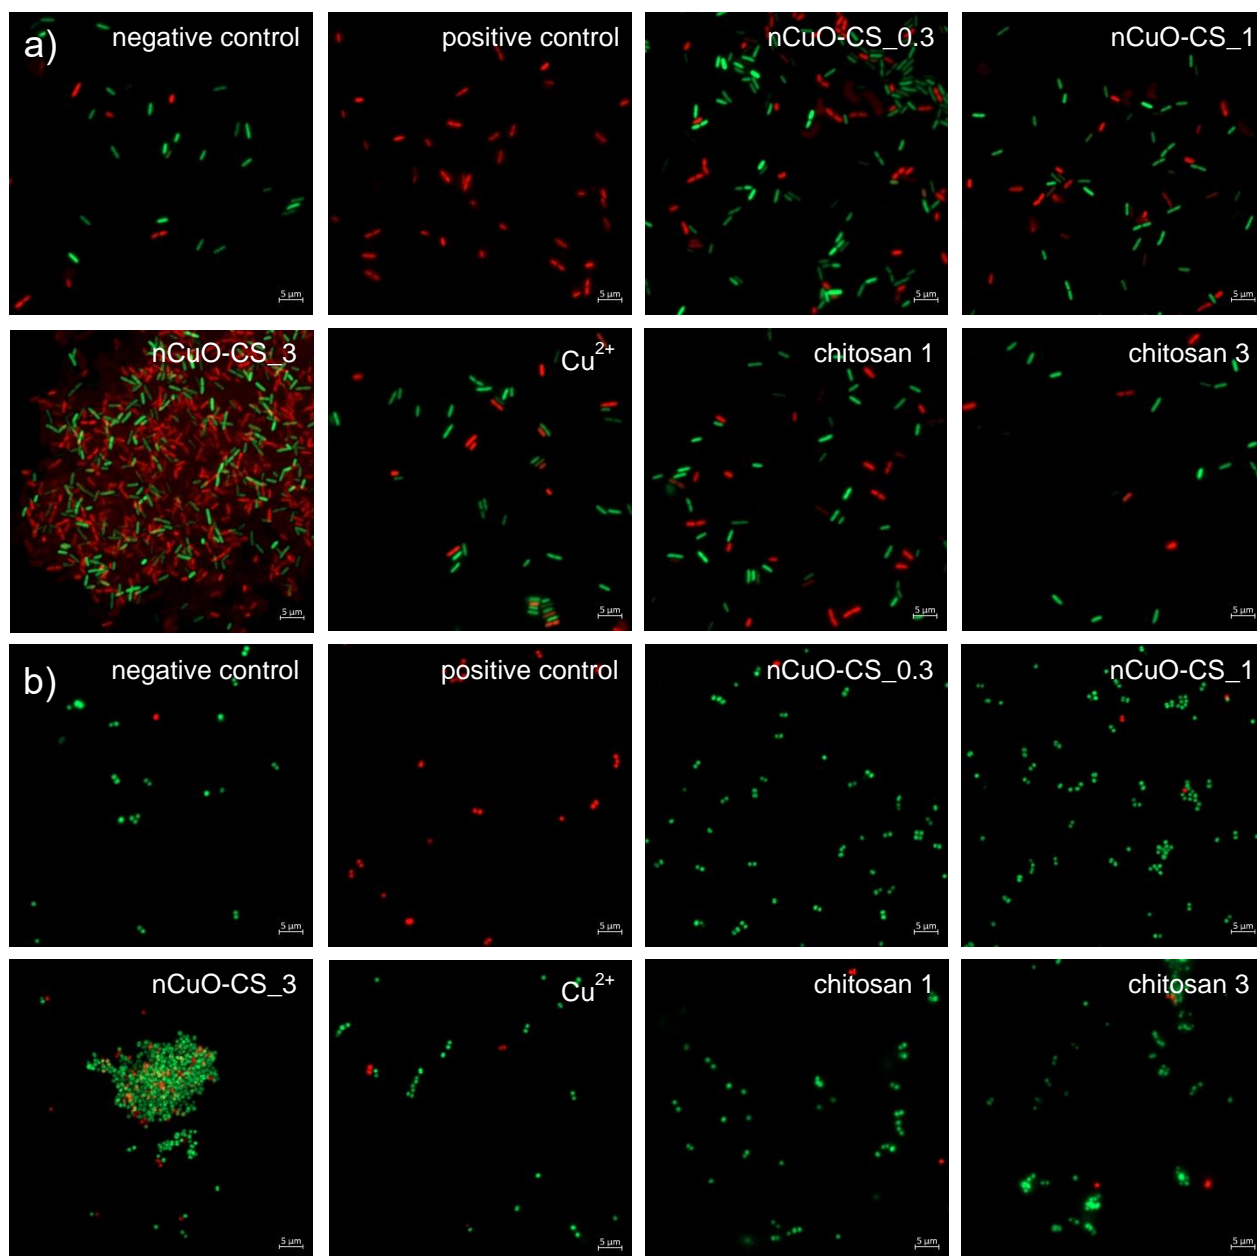

**Figure S13.** Microscopy images of bacterial cells. (a) *Pseudomonas aeruginosa* ATCC 27853 and (b) *Staphylococcus aureus* 6538 were exposed to chitosan-copper oxide nanocomposites (nCuO-CS) in deionized water at a concentration of 1 mg Cu/L for 1 h at 30°C in the dark. nCuO-CS\_0.3, nCuO-CS\_1, and nCuO-CS\_3 designate nanocomposites with different Cu:chitosan mass ratios (1:0.3, 1:1, and 1:3, respectively). A 0.1% (w/vol) sodium dodecyl sulfate solution was used as a positive control for membrane-compromised cells. Copper(II) acetate (1 mg Cu/L) and low molecular weight chitosan (1 and 3 mg/L) were analyzed for comparison. After exposure, the cells were stained with propidium iodide and SYTO 9. All scale bars are 5  $\mu$ m.
